# Supplementary material for: Influence of counterions on the structure of bis(oxazoline)copper(ii) complexes; an EPR and ENDOR investigation
Source: Royal Society of Chemistry journal article supplement (doi:10.1039/c2dt31273e), 2012-01-01
Supplement: c2dt31273e.pdf [file c2dt31273e.pdf]

## **Influence of counterions on the structure of bis(oxazoline)copper(II) complexes; An EPR and ENDOR investigation.**

Mari Elena Owen, Emma Carter,\* Graham J. Hutchings, Benjamin D. Ward,  
Damien M. Murphy\*

*School of Chemistry, Cardiff University, Main Building, Park Place,  
Cardiff CF10 3AT, UK.*

### ELECTRONIC SUPPLEMENTARY INFORMATION

| <u>List of Figures</u>                                                  | Pg |
|-------------------------------------------------------------------------|----|
| <b>S1</b> CW X-band EPR of CuCl <sub>2</sub> :BOX, variable ratio study | 1  |
| <b>S2</b> CW Q-band <sup>14</sup> N ENDOR of [Cu( <b>1b</b> )]          | 2  |
| <b>S3</b> CW Q-band <sup>14</sup> N ENDOR of [Cu( <b>1c</b> )]          | 3  |

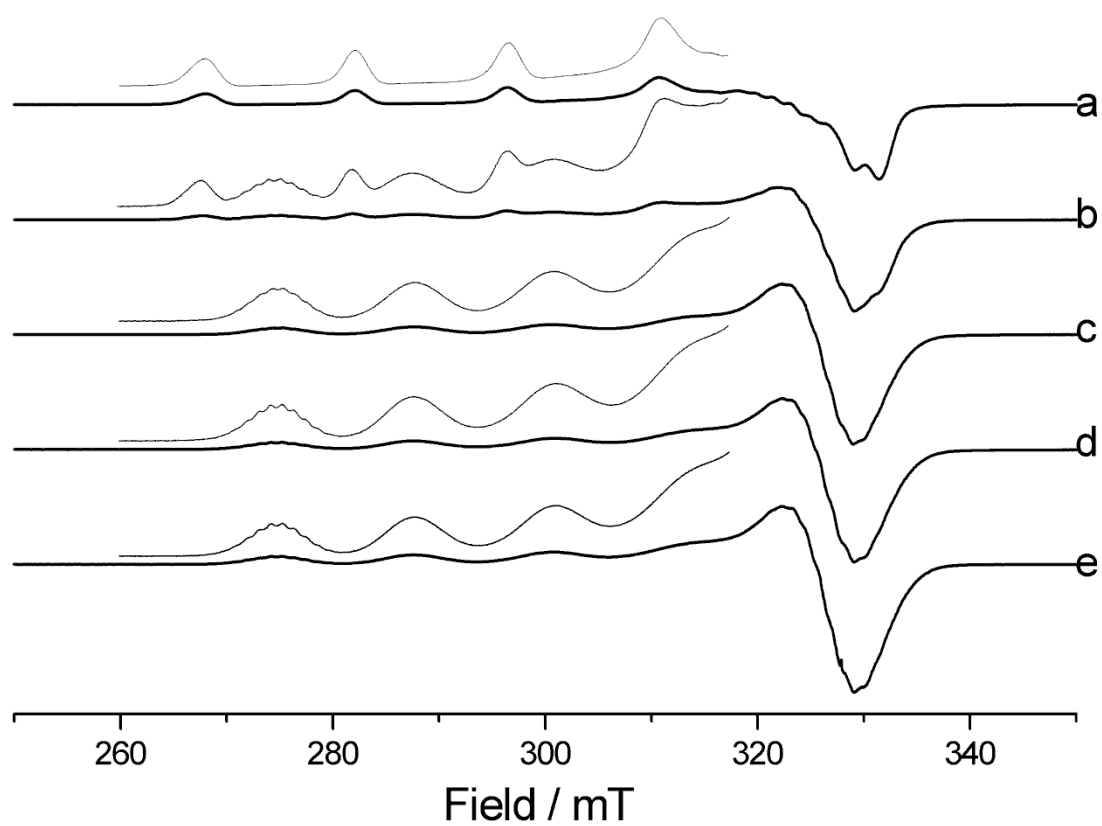

**Figure S1** X-band CW EPR spectra (140 K) of a)  $\text{Cu}^{\text{II}}\text{Cl}_2$  dissolved in DCM:THF, containing increasing Cu:BOX (**1**) ratios; b) 1:0.5, c) 1:1, d) 1:2 and e) 1:6.

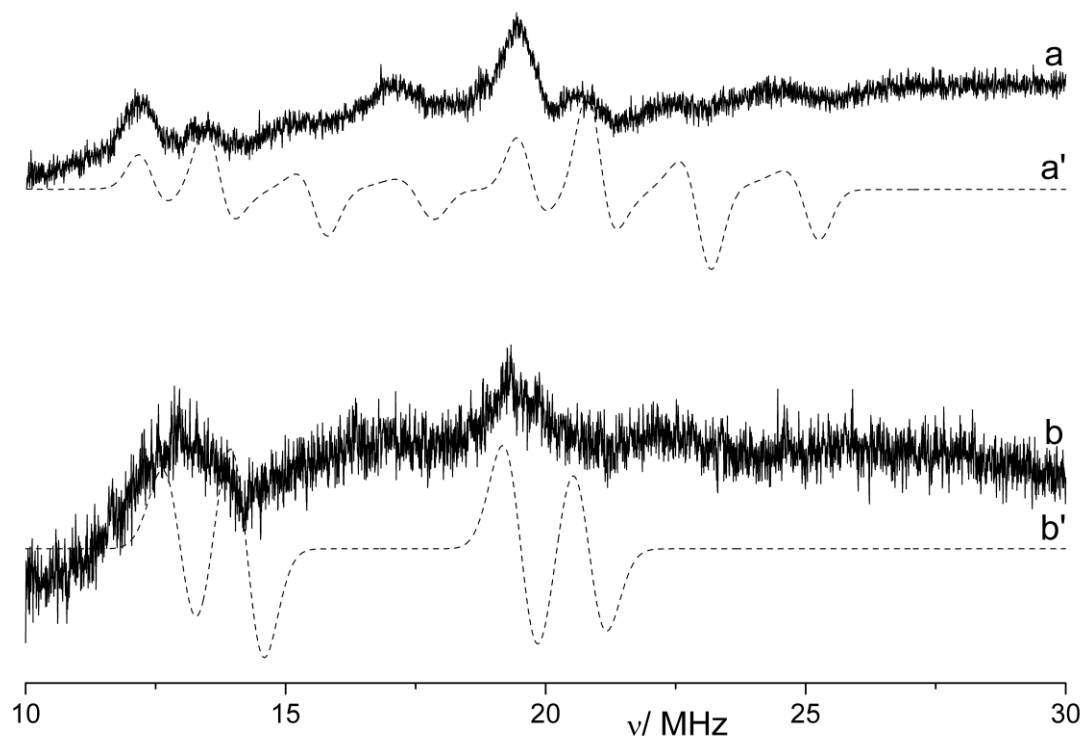

**Figure S2** CW  $^{14}\text{N}$  ENDOR spectra (10 K) of  $[\text{Cu}(\mathbf{1b})]$  recorded at the field positions corresponding to a)  $g = g_{\perp}$  and b)  $g = g_{\parallel}$ . The corresponding simulations are given in a' and b'.

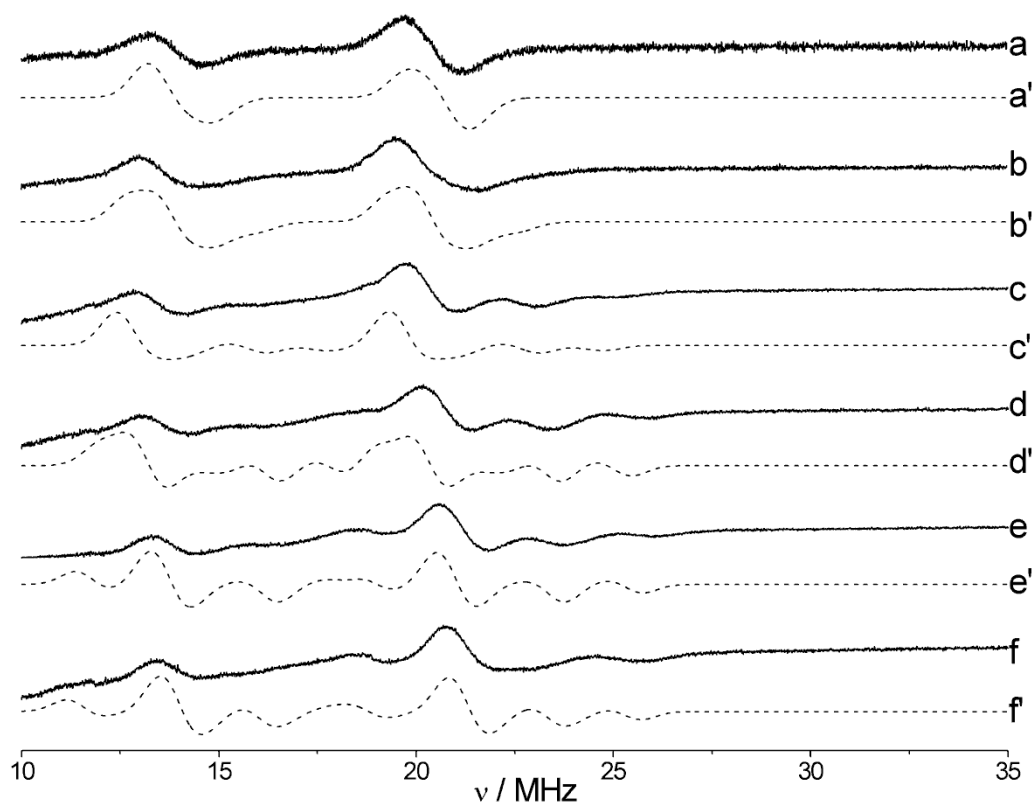

**Figure S3** CW Q-band  $^{14}\text{N}$  ENDOR spectra (10 K) of  $[\text{Cu}(\mathbf{1c})]$  recorded at the field positions a) 1056.3, b) 1073.5, c) 1130.6, d) 1159.2, e) 1179.2, and f) 1189.2 mT. The corresponding simulations are given in a' – f'.
